# Supplementary material for: Long noncoding RNA H19 indicates a poor prognosis of colorectal cancer and promotes tumor growth by recruiting and binding to eIF4A3
Source: PubMed Central journal article supplement (PMC5008352; doi:10.18632/oncotarget.8063), 2016-03-14
Supplement: oncotarget-07-22159-s001.pdf [file oncotarget-07-22159-s001.pdf]

## Long noncoding RNA H19 indicates a poor prognosis of colorectal cancer and promotes tumor growth by recruiting and binding to eIF4A3

### Supplementary Materials

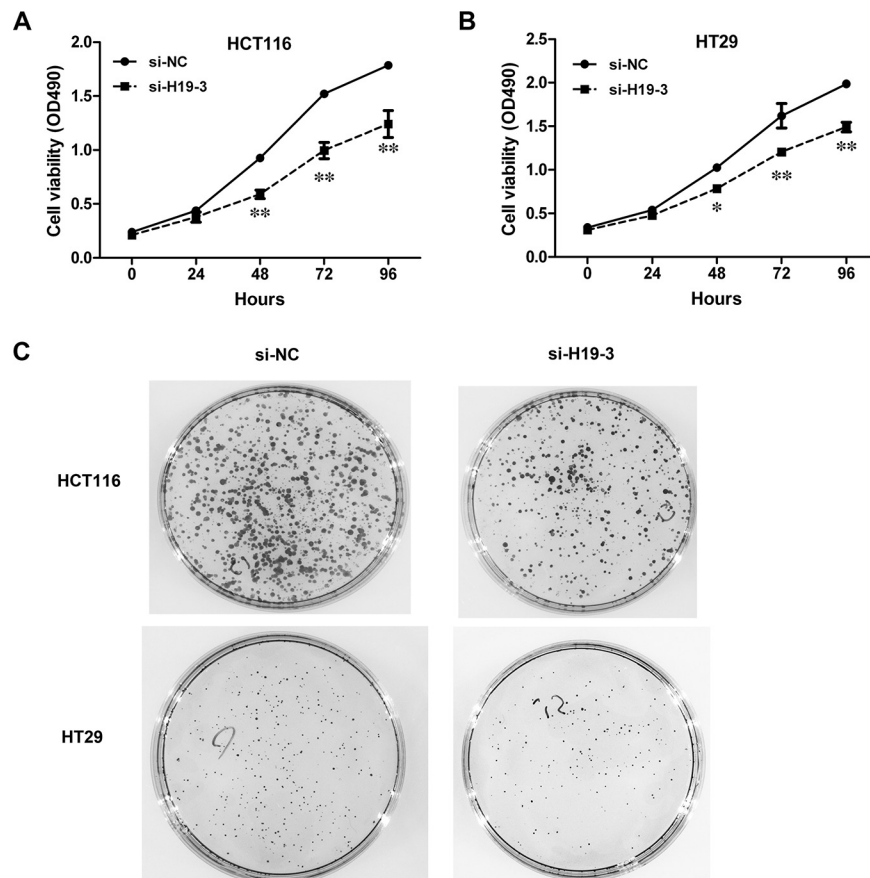

**Supplementary Figure S1: The si-H19-3 inhibited CRC cell proliferation effectively.** Cell viability of HCT116 (A) and HT29 (B) cells with si-H19-3 treatment. (C) Colony formation of HCT116 and HT29 cells with si-H19-3 treatment. The data are expressed as the mean  $\pm$  SD. The results are representative of three independent experiments. \* $P < 0.05$ , \*\* $P < 0.01$ .
